# Supplementary material
Source: PubMed Central journal article supplement (PMC7965760)
Supplement: 3752_materials.pdf [file 3752_materials.pdf]

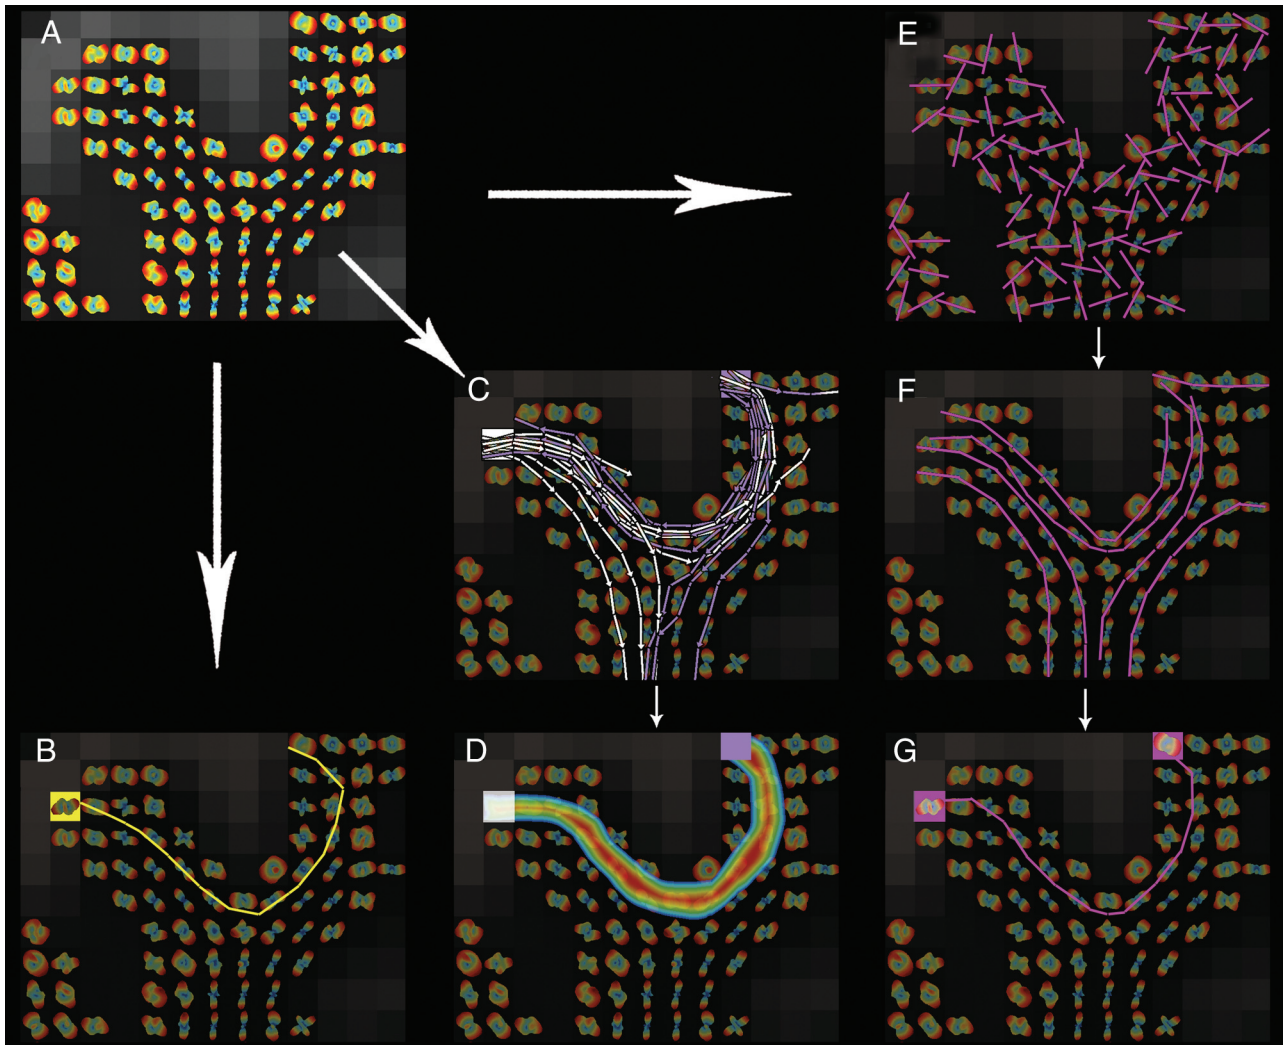

**ON-LINE FIG 1.** Diffusion tractography of short association fibers by different algorithms. Detail of a juxtacortical area of the human brain. The diffusion signal in each voxel is depicted by an orientation distribution function (A). The FACT algorithm is starting from a selected voxel (*yellow rectangle*) and propagates to the next voxel along the principal orientation of diffusion (B). Probabilistic algorithm curves originate from selected voxels (*white and purple*) and are spread by random walks throughout the diffusion data (C). The probabilistic map of connectivity depicts the most probable mathematic pathway between the 2 voxels (D, *red: high probability, cyan: low probability*). In global tracking, the diffusion information is represented first by linear segments (E), which are then aligned together by means of a “virtual annealing” procedure (F). In the postprocessing step, the postulated pathway is delineated by those fibers that pass through both selected voxels (G, *magenta rectangle*).

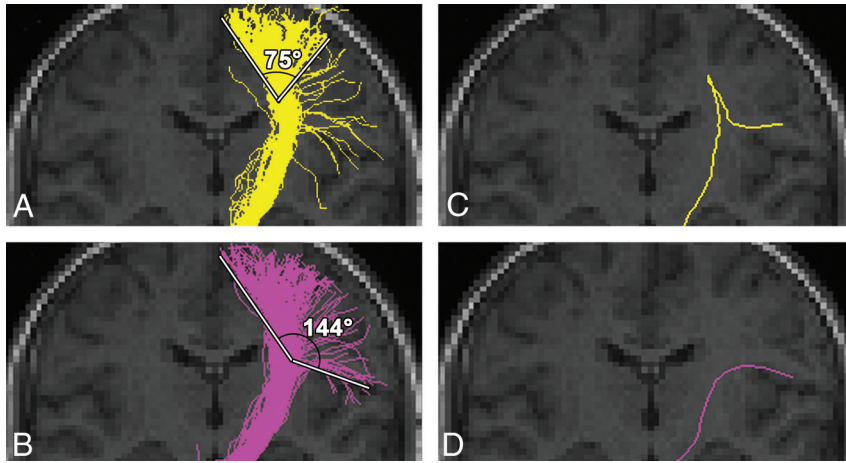

**ON-LINE FIG 2.** Depiction of the left descending motor pathways on the healthy side in patient 3. Fibers arising from the face area of the precentral gyrus crossing the SLF are shown for FACT (A and C) and global tracking (B and D). Note the smooth route of 1 selected fiber reconstructed by global tracking (D), in contrast to the false-positive fiber course reconstructed by the FACT algorithm, which does not overcome the crossing and follows an anatomically aberrant path.

**On-line Table: Clinical characteristics, identified fiber pathways, and postoperative outcome of the 20 patients**

| Pt # | Sex, Age (y) | Seizure Type                                | Lesion Location and Size (Max Diameter Given in cm)          | Histologic or Neuroradiologic Diagnosis                                      | Identified Fiber Pathway | Postoperative Outcome According to Engel <sup>13</sup> and ILAE Classifications <sup>14</sup> |
|------|--------------|---------------------------------------------|--------------------------------------------------------------|------------------------------------------------------------------------------|--------------------------|-----------------------------------------------------------------------------------------------|
| 1    | Male, 3      | Simple partial                              | Left postcentral gyrus (3.1)                                 | Oligodendroglioma, WHO grade II                                              | DMP                      | Seizure-free (Engel: Ia, ILAE: 1 <sup>14</sup> )                                              |
| 2    | Male, 15     | Simple partial, generalized tonic-clonic    | Left middle frontal gyrus, next to precentral gyrus (2.0)    | Focal cortical dysplasia, Palmini 2a <sup>25</sup>                           | DMP                      | Less frequent seizures (Engel: IIb, ILAE: 3 <sup>14</sup> )                                   |
| 3    | Female, 12   | Complex partial                             | Right postcentral gyrus (3.5) and posterior semiovale center | Astrocytoma, WHO grade II                                                    | DMP                      | Seizure-free (Engel: Ia, ILAE: 1 <sup>14</sup> )                                              |
| 4    | Female, 31   | Complex partial                             | Right postcentral sulcus (2.9)                               | Arteriovenous malformation                                                   | DMP                      | Seizure-free (Engel: Ia, ILAE: 1 <sup>14</sup> )                                              |
| 5    | Male, 47     | Simple and complex partial                  | Left cingulate gyrus (3)                                     | Cavernoma                                                                    | DMP                      | Seizure-free (Engel: Ia, ILAE: 1 <sup>14</sup> )                                              |
| 6    | Female, 66   | Simple and complex partial                  | Left insular lobe (1.2)                                      | Cavernoma                                                                    | DMP                      | Less frequent seizures (Engel: IIb, ILAE: 3 <sup>14</sup> )                                   |
| 7    | Female, 19   | Simple partial                              | Left thalamus and insula (2.5 and 1.8)                       | Cavernoma                                                                    | DMP                      | Seizure-free (Engel: Ia, ILAE: 1 <sup>14</sup> )                                              |
| 8    | Male, 36     | Simple partial, generalized tonic-clonic    | Right middle frontal gyrus (3.0)                             | Imaging suspected focal cortical dysplasia                                   | DMP                      | No operation; DMP close to lesion                                                             |
| 9    | Male, 28     | Simple partial, generalized tonic-clonic    | Right frontal lobe                                           | Neuroradiologic diagnosis of closed-lip schizencephaly                       | DMP                      | No operation; motor area in epileptogenic area                                                |
| 10   | Female, 36   | Simple and complex partial                  | Left precentral gyrus (1.4)                                  | Neuroradiologic diagnosis of focal cortical dysplasia                        | DMP                      | No operation; DMP close to a transmantle extension                                            |
| 11   | Female, 31   | Complex partial, generalized tonic-clonic   | Right medial occipital gyrus (1.3)                           | Focal cortical dysplasia, Palmini 2b <sup>25</sup>                           | OR                       | Less frequent seizures (Engel: IIIa, ILAE: 4 <sup>14</sup> )                                  |
| 12   | Female, 17   | Simple partial, upper right quadrant anopia | Left lingual gyrus (1.9)                                     | Cavernoma                                                                    | OR                       | Seizure-free (Engel: Ib, ILAE: 2 <sup>14</sup> ); persisting upper right quadrant anopia      |
| 13   | Male, 51     | Complex partial, generalized tonic-clonic   | Right hippocampus and temporal lobe                          | Hippocampal sclerosis and focal cortical dysplasia, Palmini Ia <sup>25</sup> | OR                       | Seizure-free (Engel: Ia, ILAE: 1 <sup>14</sup> )                                              |
| 14   | Male, 40     | Simple and complex partial                  | Right hippocampus                                            | Hippocampal sclerosis                                                        | OR                       | Less frequent seizures (Engel: Ib, ILAE: 3 <sup>14</sup> ); left upper visual field defect    |
| 15   | Female, 9    | Simple and complex partial                  | Left perisylvian and insular cortex                          | Perinatal infarction                                                         | OR                       | Seizure-free (Engel: Ia, ILAE: 1 <sup>14</sup> ); lower right quadrant anopia                 |
| 16   | Female, 6    | Simple and complex partial                  | Right occipital-temporal lobe (0.8)                          | Cavernoma                                                                    | OR                       | Less frequent seizures (Engel: IIIa, ILAE: 4 <sup>14</sup> )                                  |
| 17   | Male, 18     | Simple and complex partial                  | Left occipital-temporal area (2.6)                           | Dysembryoplastic neuroepithelial tumor                                       | OR                       | Seizure-free (Engel: Ia, ILAE: 1 <sup>14</sup> )                                              |
| 18   | Male, 14     | Generalized tonic-clonic                    | Left precuneus and cuneus (4.3)                              | No histologic classification possible                                        | OR                       | Less frequent seizures (Engel: IIIa, ILAE: 5 <sup>14</sup> )                                  |
| 19   | Female, 27   | Simple partial                              | Right occipital-temporal area (2.8)                          | Imaging suspected focal cortical dysplasia                                   | OR                       | No operation; epileptogenic area adjacent to OR                                               |
| 20   | Female, 28   | Complex partial                             | Right occipital-temporal area (1.7 cm)                       | Imaging suspected focal cortical dysplasia                                   | OR                       | No operation; epileptogenic area adjacent to OR                                               |

**Note:**—ILAE indicates International League Against Epilepsy; WHO, World Health Organization.
